# Supplementary material for: Antibiotics for acute respiratory tract infections in primary care
Source: HighWire-hosted journal article supplement (doi:10.1136/bmj.i3482), 2016-07-05
Supplement: bmj.i3482.pdf [file bmj.i3482.pdf]

# 抗生素在急性呼吸道感染初级医疗中的应用

最新研究确认减少抗生素处方是安全的

## Antibiotics for acute respiratory tract infections in primary care

Fresh reassurance that reducing prescribing is safe

来源:BMJ 2016; 354:i3482 doi: 10.1136/bmj.i3482

随着抗击全球范围的抗生素耐药危机,抗生素药物的管理逐渐成为初级医疗工作的重点。大约四分之三的抗生素应用于初级医疗,而呼吸道感染是最常见使用抗生素治疗的感染性疾病,主要包括中耳炎、咽喉痛、咳嗽(急性支气管炎)、鼻窦炎,以及不确定的感染。

然而,在权衡抗生素治疗呼吸道感染的效益与成本时,后者中的抗生素耐药是最少被考虑的。呼吸道感染通常是由病毒引起的自限性疾病,但在初级医疗中很难甚至是不可能鉴别病毒感染与细菌感染。来自Cochrane综述的强证据显示,使用抗生素减少疾病周期平均不足1天<sup>14</sup>。因此,在初级医疗中我们应该慎用抗生素,降低甚至消除由于大量使用抗生素直接造成的耐药<sup>5</sup>。一个简单的解决方法是,在初级医疗中向所有呼吸道感染的患者解释清楚抗生素对感染的治疗效果有限。

然而,解决问题常常不那么简单,初级医疗的医生给呼吸道感染患者处方抗生素的理由很多。除了患者和医生对抗生素的效果存有不现实的错误理念外,另一个重要原因是出于对安全的考虑。初级医疗的医生担心普通自限性感染的假

象有可能导致漏诊严重感染,尤其在疾病进展的早期。如脑膜炎和其他威胁生命的疾病在早期有时与呼吸道感染难以鉴别<sup>6</sup>。这种担心清楚地说明处方抗生素只是“以防万一”。抗生素处方率可能与初级医疗的医生对风险的承受力有关。

近半个世纪以来,我们认识到初级医疗医生的抗生素处方率大不相同<sup>7</sup>,这就提出一个问题,是否处方抗生素较少的医生治疗效果不如处方抗生素较多的医生?我们使用系统性综述和随机对照的荟萃分析,可以比较明确地回答:抗生素与疾病症状和常见并发症之间“几乎没有”关系。

但是,那些罕见的更危险的呼吸道感染并发症是怎样的呢?是否因为太罕见而未被试验收集到呢?一篇链接论文(摘要见本期第303页;doi:10.1136/bmj.i3410)源自Gulliford及其同事们的相关调查研究,该研究应用一个庞大的电子健康数据库,获取英国所有初级医疗就诊患者中7%(大约4500万患者年)的信息<sup>8</sup>。他们按照抗生素处方率的不同将诊所分为4组,比较了最低和最高组发生少见严重感染的发生率。其中包括新发的肺炎、扁桃体炎(扁桃体周围脓肿)、乳突炎、脓胸、

Chris Del Mar  
professor of public  
health

Centre for Research  
in Evidence Based  
Practice, Bond  
University, Gold  
Coast, Australia  
cdelmar@bond.edu.au

许 阳 译  
陈良安 校  
解放军总医院  
呼吸内科

脑膜炎、颅内脓肿及雷米尔综合征(一种由咽喉炎引起的罕见的厌氧菌败血症)<sup>9</sup>。他们检测了这一假设:低抗生素处方率可能会与较高的严重感染发生率相关。

分析发现,低抗生素处方率与肺炎和扁桃体炎发生率相关,但与其他严重感染无关。了解这一效果的大小非常重要。研究者根据模型计算出,在英国一个平均拥有7 000名患者的初级医疗诊所,如果抗生素处方率减少10%,每年仅增加1例肺炎,每10年仅增加1例扁桃体炎。

从医生的个人角度来看,在英国1位初级医疗医生大约负责1 500人的医疗服务<sup>10</sup>。减少10%的抗生素处方率意味着每4年或5年仅增加1例肺炎和每40年到50年仅增加1例扁桃体炎的风险。在初级医疗诊所水平,抗生素处方率与乳突炎以及初期貌似呼吸道感染但有致命危险的脑膜炎、脓胸、颅内脓肿、雷米尔综合征等的发生率之间没有相关性。这项研究的样本量很大,不可能存在把握度不足,并且研究证实仅有很低风险,这有助于说服医生和患者在初级医疗中减少抗生素的应用是一个安全的选择。当然,这些并不能成为改变抗生素使用的一个主要因素。还有许多其他因素影响抗生素应用<sup>11</sup>,比如缺少患者迫切需求的和初级医疗医生可以提供的其他治疗选择<sup>12</sup>。许多医生认为抗生素耐药不是他们的问题<sup>13</sup>,而与既往的处方习惯、时间压力以及可购买抗生素等有关。我们迫切需要多种、可持续、具有成本效益的干预措施,来解决抗生素过度处方的问题,包括延时处方<sup>14</sup>和共同决策等<sup>15</sup>。Gulliford及其同事的研究发现能够支持这些干预,因为减少急性呼吸道感染抗生素处方量是安全的这一结果,为我们提供了具体和量化保证。

利益竞争(Competing interests): I have read and understood the BMJ policy on declaration of interests and declare the following: none.  
来源及同行评议(Provenance and peer review): Commissioned; not externally peer reviewed.

## 参考文献

- 1 Arroll B, Kenealy T. Antibiotics for the common cold. *Cochrane Database Syst Rev* 2002;3:CD000247 pmid:12137610.
- 2 Smith SM, Fahey T, Smucny J, Becker LA. Antibiotics for acute bronchitis. *Cochrane Database Syst Rev* 2014;3:CD000245 pmid:24585130.
- 3 Spinks A, Glasziou PP, Del Mar CB. Antibiotics for sore throat. *Cochrane Database Syst Rev* 2013;11:CD000023 pmid:24190439.
- 4 Venekamp RP, Sanders SL, Glasziou PP, Del Mar CB, Rovers MM. Antibiotics for acute otitis media in children. *Cochrane Database Syst Rev* 2015;6:CD000219 pmid:26099233.
- 5 Costelloe C, Metcalfe C, Lovering A, Mant D, Hay AD. Effect of antibiotic prescribing in primary care on antimicrobial resistance in individual patients: systematic review and meta-analysis. *BMJ* 2010;340:c2096.doi:10.1136/bmj.c2096 pmid:20483949.
- 6 Craig JC, Williams GJ, Jones M, et al. The accuracy of clinical symptoms and signs for the diagnosis of serious bacterial infection in young febrile children: prospective cohort study of 15 781 febrile illnesses. *BMJ* 2010;340:c1594.doi:10.1136/bmj.c1594 pmid:20406860.
- 7 Howie JG, Richardson IM, Gill G, Durno D. Respiratory illness and antibiotic use in general practice. *J R Coll Gen Pract* 1971;21:657-63 pmid:5144383.
- 8 Gulliford MC, Moore MV, Little P, et al. Safety of reduced antibiotic prescribing for self limiting respiratory tract infections in primary care: cohort study using electronic health records. *BMJ* 2016;254:i3410.
- 9 Lemierre A. On certain septicaemias due to anaerobic organisms. *Lancet* 1936;227:701-3.doi:10.1016/S0140-6736(00)57035-4.
- 10 Nuffield Trust. GP numbers relative to UK populations. www.nuffieldtrust.org.uk/node/2540.
- 11 Hansen MP, Hoffmann TC, McCullough AR, van Driel ML, Del Mar CB. Antibiotic Resistance: What are the opportunities for primary care in alleviating the crisis? *Front Public Health* 2015;3:35. doi:10.3389/fpubh.2015.00035 pmid:25759809.
- 12 Doust J, Del Mar C. Why do doctors use treatments that do not work? *BMJ* 2004;328:474-5.doi:10.1136/bmj.328.7438.474 pmid:14988163.
- 13 McCullough AR, Rathbone J, Parekh S, Hoffmann TC, Del Mar CB. Not in my backyard: a systematic review of clinicians' knowledge and beliefs about antibiotic resistance. *J Antimicrob Chemother* 2015;70:2465-73.doi:10.1093/jac/dkv164 pmid:26093375.
- 14 Spurling GK, Del Mar CB, Dooley L, Foxlee R, Farley R. Delayed antibiotics for respiratory infections. *Cochrane Database Syst Rev* 2013;4:CD004417 pmid:23633320.
- 15 Coxeter P, Del Mar CB, McGregor L, Beller EM, Hoffmann TC. Interventions to facilitate shared decision making to address antibiotic use for acute respiratory infections in primary care. *Cochrane Database Syst Rev* 2015;11:CD010907 pmid:26560888.

BMJ takes no responsibility for the accuracy of the translation from the published English language original and is not liable for any errors that may occur.

# BMJ
